# Supplementary material for: Ectopy on a Single 12‐Lead ECG, Incident Cardiac Myopathy, and Death in the Community
Source: PubMed Central journal article supplement — J Am Heart Assoc. 2017 Aug 3;6(8):e006028. doi: 10.1161/JAHA.117.006028 (PMC5586444; doi:10.1161/jaha.117.006028), 2017-08-03
Supplement: JAH3-6-e006028-s001.pdf [file JAH3-6-e006028-s001.pdf]

# **SUPPLEMENTAL MATERIAL**

**Table S1.** Definitions of baseline co-morbidities used in multivariate models

|                            | <b>Cardiovascular Health Study</b>                                                                                                                                                 | <b>Atherosclerosis Risk in Communities Study</b>                                                                                                                 |
|----------------------------|------------------------------------------------------------------------------------------------------------------------------------------------------------------------------------|------------------------------------------------------------------------------------------------------------------------------------------------------------------|
| Hypertension               | Reported history of hypertension with the use of antihypertensive medication, systolic blood pressure of $\geq 140$ mmHg, or diastolic pressure of $\geq 90$ mmHg on baseline exam | Antihypertensive medication use, systolic blood pressure of $\geq 140$ mmHg, or diastolic pressure of $\geq 90$ mmHg on baseline exam                            |
| Diabetes                   | Use of antihyperglycemic medication or a fasting glucose concentration $\geq 126$ mg/dL                                                                                            | Self-reported physician-diagnosed diabetes, use of antihyperglycemic medication, fasting blood glucose $\geq 126$ mg/dL or random blood glucose $\geq 200$ mg/dL |
| Coronary heart disease     | Self-reported angina or previous coronary artery bypass, angioplasty, or myocardial infarction with confirmation by medical record review                                          | Self-reported history of coronary artery bypass, angioplasty, or myocardial infarction                                                                           |
| Myocardial infarction (MI) | Self-reported with medical record verification                                                                                                                                     | Self-reported history of physician-diagnosed MI or previous MI evident on baseline 12-lead ECG                                                                   |
| Congestive heart failure   | Self-reported with the use of medication (both diuretics and either digitalis or a vasodilator) or confirmed by medical record review                                              | Heart failure medication use or clinical evidence of heart failure                                                                                               |
| Atrial fibrillation (AF)   | Self-reported at baseline, AF on baseline Holter monitoring or on baseline standard ECG                                                                                            | Evidence of AF on baseline ECG                                                                                                                                   |
